# Supplementary material for: Viral Agents Causing Brown Cap Mushroom Disease of Agaricus bisporus
Source: PubMed Central journal article supplement — Appl Environ Microbiol. 2015 Sep 22;81(20):7125–34. doi: 10.1128/AEM.01093-15 (PMC4579443; doi:10.1128/aem.01093-15), 2015-09-22
Supplement: AEM.01093-15_zam999116653so1.pdf [file AEM.01093-15_zam999116653so1.pdf]

## SUPPLEMENTARY MATERIAL

**Figure S1.** Banding patterns of double-stranded RNA isolated from *A. bisporus* fruitbodies and used for SSH. The ds-RNAs were fractionated by agarose gel electrophoresis and visualized.

Lane A: Non-infected sample from Warwick HRI mushroom unit. Lane B: white-infected without brown symptom. Lane C: brown-infected with brown symptom. (Lanes D and E are DNA molecular weight markers).

[Selected lane D marker sizes are indicated in Kbp, far right].

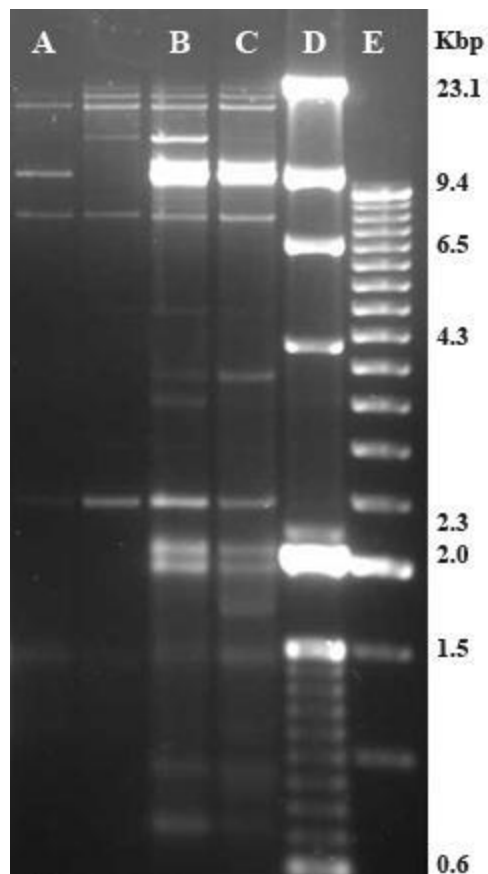

**Figure S2.** Mean RT-q-PCR analyses of transcripts of putative ds-RNAs 2008, 2019, 2120, 2121, 2122, 2125, 2126, 2127, 2129 and 2135 in white infected mushrooms (WIM), brown infected brown mushrooms (BIM) and non-infected control.

[Relative expression *i.e.* values were normalised against 18S rRNA. Vertical line shows LSD (5 %, 24 d.f.) for comparing means for a given day, as calculated from the residual mean square obtained from the ANOVA.]

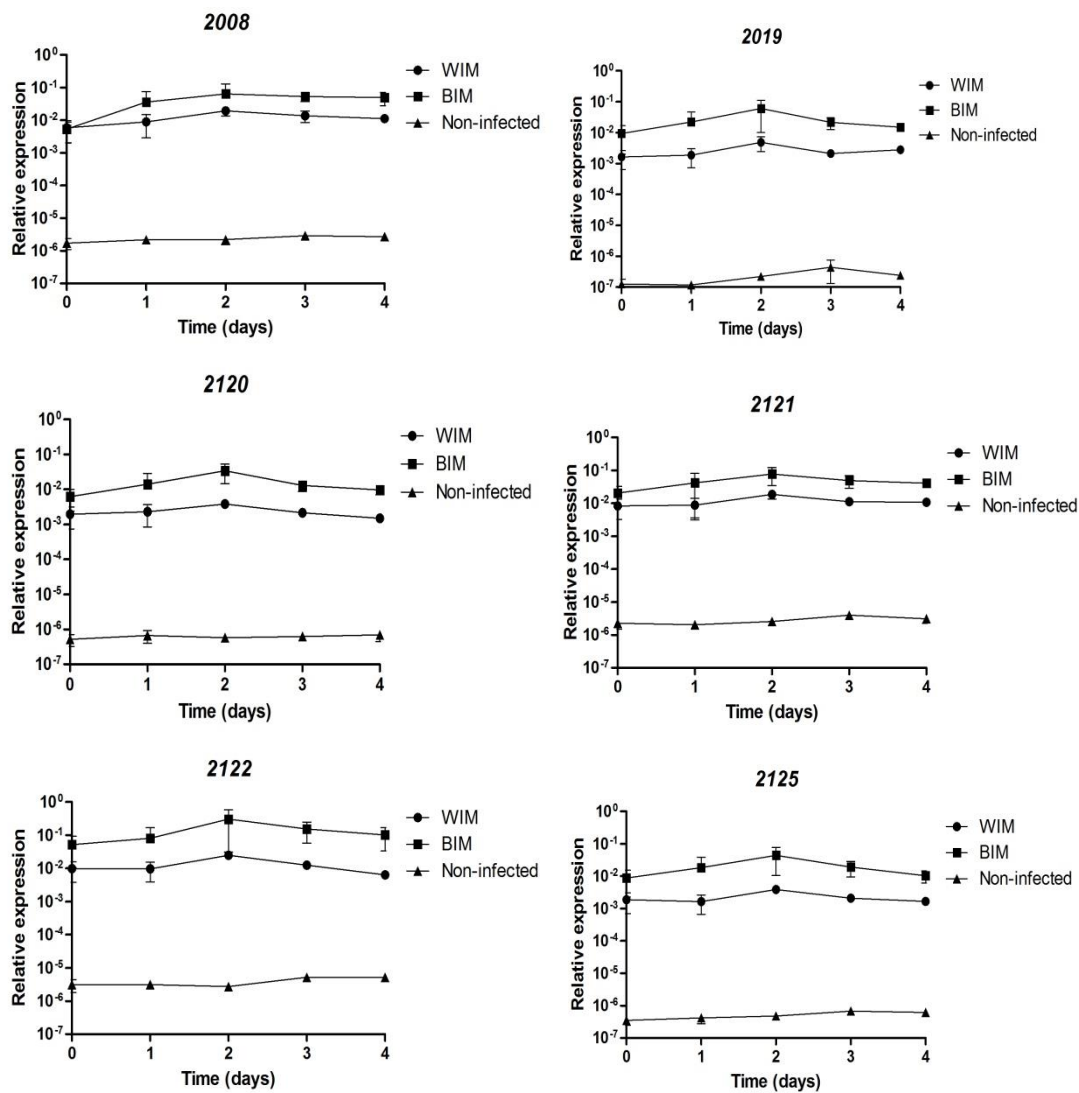

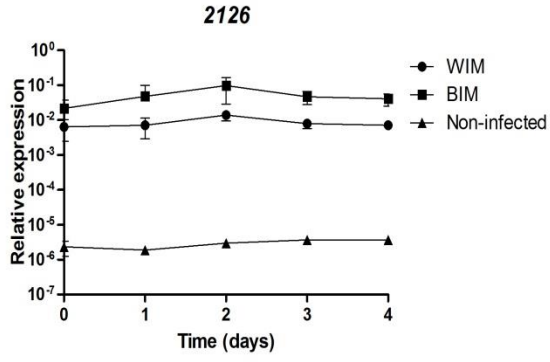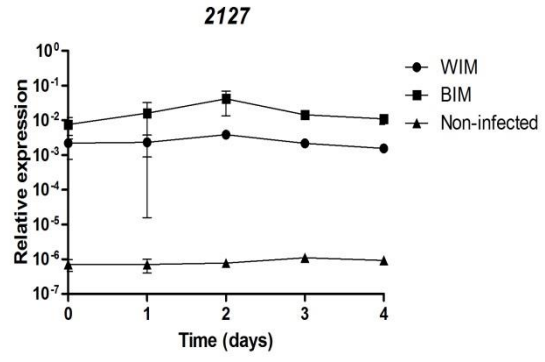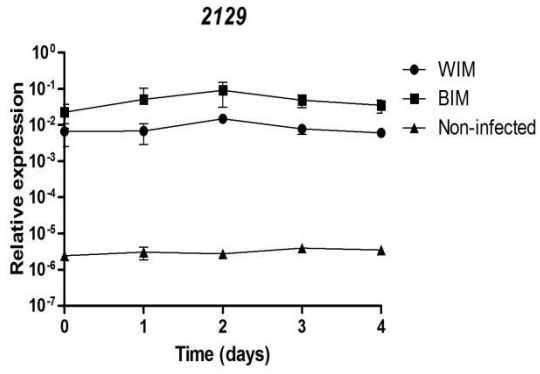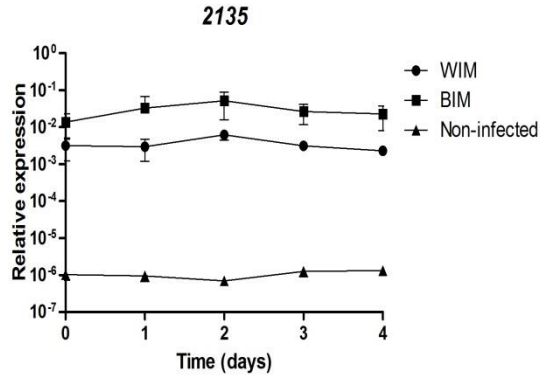

**Table S1.** Primers designed for RT-q-PCR analysis of the ten most up-regulated genes

| Gene ID | Forward                        | Reverse                       |
|---------|--------------------------------|-------------------------------|
| 2127    | TCCACGCATCCAGGCCAA<br>CA       | CTTGTCTCCCACCTGTATG<br>ACAG   |
| 2135    | CACCCTCGAAGGAGACTA<br>CTCA     | CGGCGTCGATAATGTAAG<br>CA      |
| 2121    | GGGTTGACCTGGGACATT<br>AACA     | CACGAGGTCGGAATGTCT<br>TCA     |
| 2120    | AAGGTGTCGAGAATGGTC<br>TCA      | AAGCCTGGAATCTTTCCA<br>ATG     |
| 2125    | CACTATTGAACCGGAATT<br>GCACACGA | CGGAAGTGCCTGCCTTTG<br>AATCTA  |
| 2008    | TCAGCCAAGGCACAGGTC<br>TT       | CCCGAAGTTCATTATGAC<br>CAGTCTC |
| 2126    | ACGAGGAAAGGATTAGG<br>AGAAGCA   | ACAGGCCAAAACCTTGCGA<br>ACTG   |
| 2019    | CACTTTCAGGTGCCCTAT<br>GA       | TGGGCGGCAGGTGACTT             |
| 2122    | GCCGACGCCAAACTAACA<br>AT       | GAACGCTGAAGTATCCCT<br>TTCG    |
| 2129    | CGGCGTCCGATGTCTTG              | ACTCCGGAAGCTGCTGA<br>AG       |

**Table S2.** Sequences for non-Agaricus (presumed viral) transcripts less than 100bp in length

| Transcript ID | Sequence                                                         |
|---------------|------------------------------------------------------------------|
| 2125          | ACACTATTGAACCGGAATTGCACACGACGTATACTTTAATGCGCCGT<br>CGCCTAGATTCAA |
| 2126          | ACGAGGAAAGGATTAGGAGAAGCAACTCCGGGAAAACAGTTCGCA<br>AGGTTTTGCCTGTT  |
